# Supplementary material for: FKBP52 overexpression accelerates hippocampal-dependent memory impairments in a tau transgenic mouse model
Source: PubMed Central journal article supplement (PMC8093247; doi:10.1038/s41514-021-00062-x), 2021-05-03
Supplement: 41514_2021_62_MOESM2_ESM.pdf [file 41514_2021_62_MOESM2_ESM.pdf]

1 Supplementary Information for

2

3 **FKBP52 overexpression accelerates hippocampal-dependent memory impairments in a**  
4 **tau transgenic mouse model**

5

6 Marangelie Criado-Marrero<sup>1</sup>, Niat T. Gebru<sup>1</sup>, Lauren A. Gould<sup>1</sup>, Danielle M. Blazier<sup>1</sup>, Yamile Vidal  
7 Aguiar<sup>1</sup>, Taylor M. Smith<sup>1</sup>, Salma S. Abdelmaboud<sup>1</sup>, Lindsey B. Shelton<sup>1</sup>, Xinming Wang<sup>2</sup>, Jan  
8 Dahrendorff<sup>1</sup>, David Beaulieu-Abdelahad<sup>1</sup>, Chad A. Dickey<sup>1,§</sup>, Laura J. Blair<sup>1,3,\*</sup>

9 <sup>1</sup>Department of Molecular Medicine, Morsani College of Medicine, USF Health Byrd Alzheimer's  
10 Institute, University of South Florida, Tampa, FL 33613, USA

11 <sup>2</sup>Department of Molecular Pharmacology and Physiology, College of Medicine, USF Health Byrd  
12 Alzheimer's Institute, University of South Florida, Tampa, FL 33613, USA.

13 <sup>3</sup>Research Service, James A Haley Veterans Hospital, 13000 Bruce B Downs Blvd, Tampa, FL  
14 33612, USA

15 <sup>§</sup>Deceased

16 <sup>\*</sup>Corresponding author

17 **Email:** laurablair@usf.edu

18

19

20 **This PDF file includes:**

21

22           Supplementary material: Figures S1 to S4

23

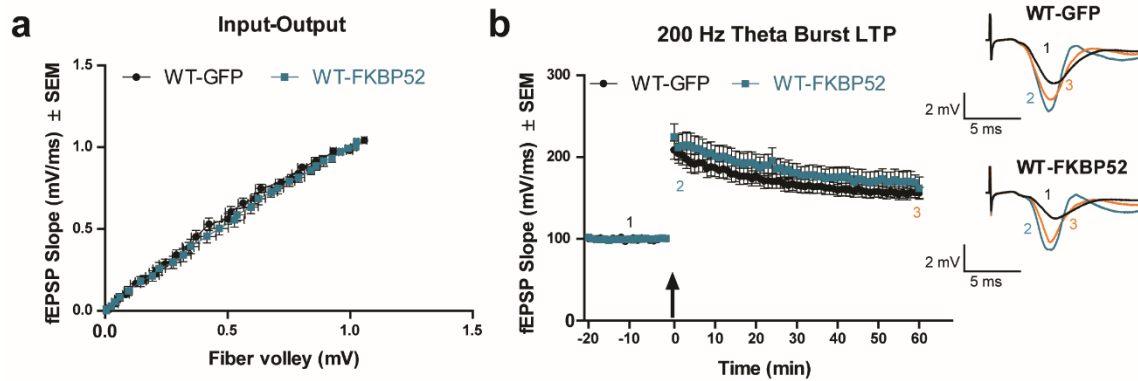

25  
26  
27

**Supplementary Figure 1. FKBP52 overexpression did not affect hippocampal LTP in WT**

28 **mice.** **a** The Input-Output (I-O) curve was calculated to evaluate pre- and post-synaptic excitatory  
29 function. The I-O curve compares the fEPSP slope (mV/ms) versus the fiber volley amplitude (mV).  
30 **b** LTP was measured in ex vivo hippocampal slices from WT mice infused with AAV9-GFP or AAV9-  
31 FKBP52. Stimulating electrode was positioned in the Schaffer collaterals (between CA3 and CA1)  
32 and recordings were obtained in the CA1 pyramidal neurons. A 200Hz Theta Burst stimulation was  
33 given to induce LTP (indicated by the arrow). Following this, field EPSPs were measured for 60-  
34 minutes. Representative traces are shown as: 1 (black) indicates baseline, 2 (teal) indicates initial  
35 early LTP in the first minute following HFS, and 3 (orange) indicates late LTP in the last 60 minutes  
36 of recording. Data analyzed by repeated measures two-way ANOVA. Data is shown in standard  
37 error of the mean ( $\pm$  SEM).  $n = 27$  for WT-GFP and  $n = 23$  WT-FKBP52. AAV9, adeno-associated  
38 virus serotype 9; fEPSP = field excitatory postsynaptic potential; LTP, long-term potentiation; min  
39 = minutes; mV, millivolts; ms, milliseconds; Hz, hertz.

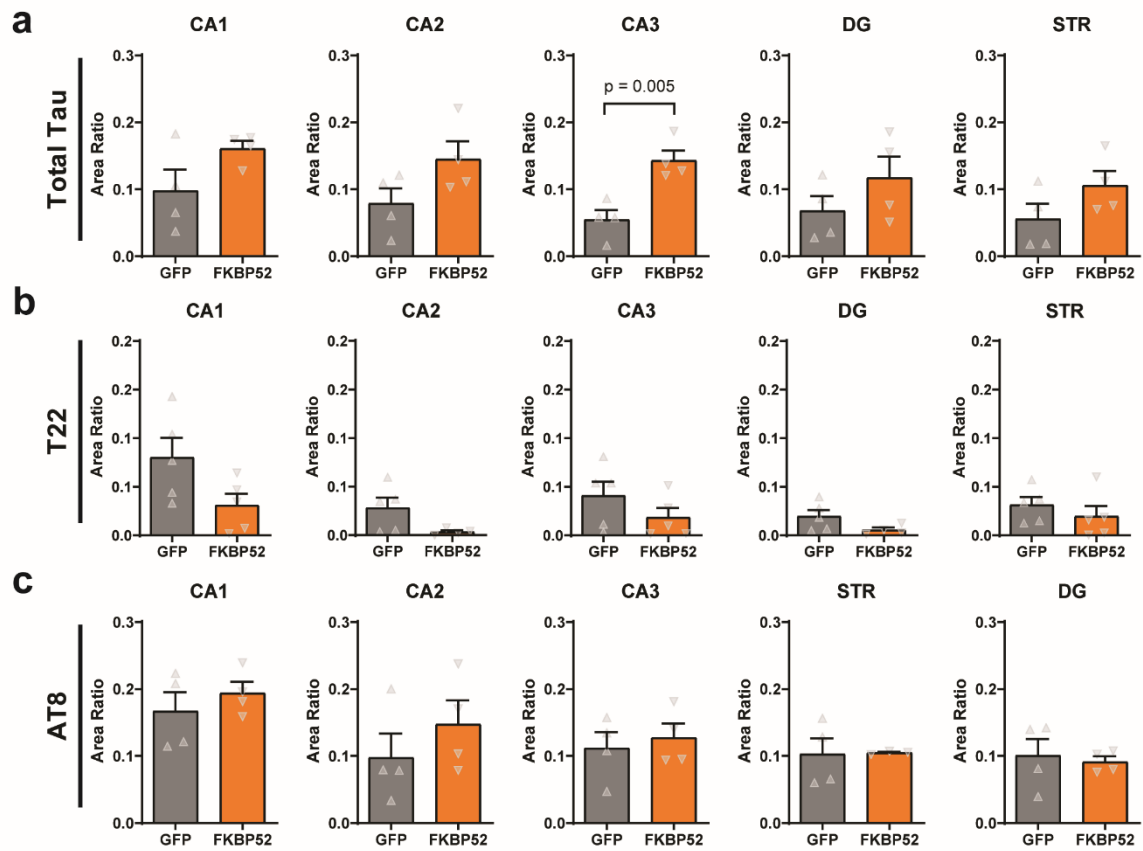

40

41 **Supplementary Figure 2. Total tau levels were increased in CA3 of rTg4510-FKBP52 mice.**

42 Hippocampal slices were obtained from rTg4510 mice injected with AAV9-GFP and AAV9-

43 FKBP52. **a** Quantification of tau levels using tau (DAKO) antibody. **b** Quantification of oligomeric

44 tau levels using T22 antibody. **c** Quantification of pS202/T205 levels (AT8 antibody) in the

45 hippocampi. Protein levels were analyzed by unpaired t-test, where statistical significance is

46 considered by \* $p < 0.05$  Results represented as standard error of the mean ( $\pm$  SEM); GFP,  $n = 4$ ;

47 FKBP52,  $n = 4$ ).

48

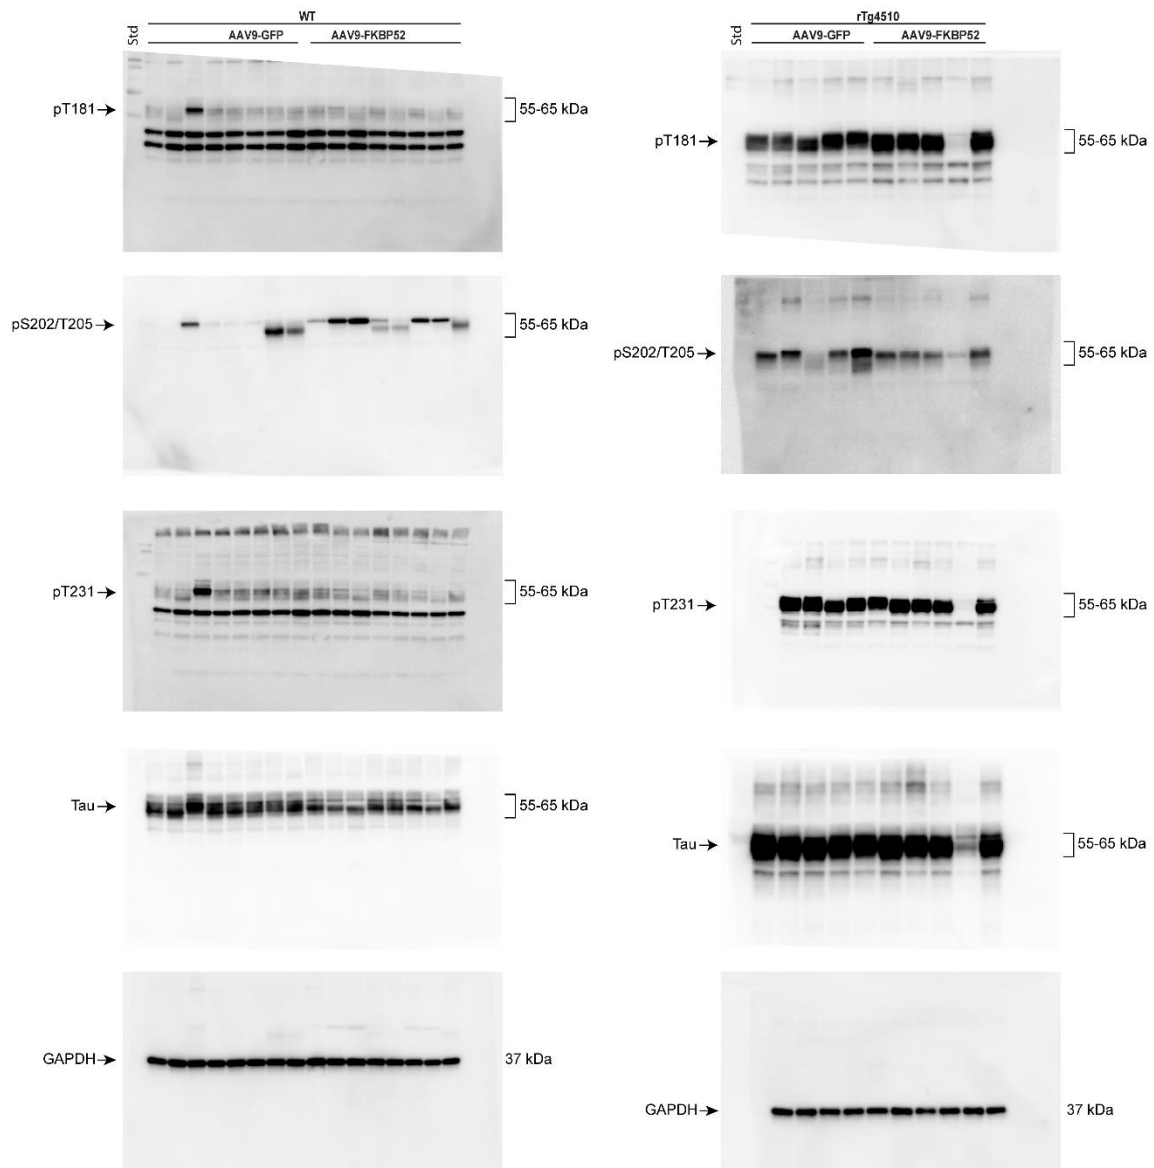

49

50

+

51 **Supplementary Figure 3. Western blot membranes for total tau and phospho-tau species.**

52 Western blot membranes of soluble fractions for total tau and tau phosphorylated species including

53 pT181, pS202/pT205 (AT8), and pT231 (AT180). Hippocampal tissue from WT and rTg4510 mice

54 expressing either AAV9-GFP or AAV9-FKBP52 was used in these blots. Membranes were run in

55 parallel and derived from the same experiments. Quantification of protein was performed using

56 Image Lab (Bio-Rad) software. Total protein was normalized to GAPDH. WT-GFP (n = 8), WT-

57 FKBP52 (n = 8), rTg4510-GFP (n = 5), rTg4510-FKBP52 (n = 5). AAV9, adeno-associated virus

58 serotype 9; GFP, green fluorescent protein; GAPDH, Glyceraldehyde 3-phosphate dehydrogenase;  
59 WT, wild-type; Std, Protein Standards.

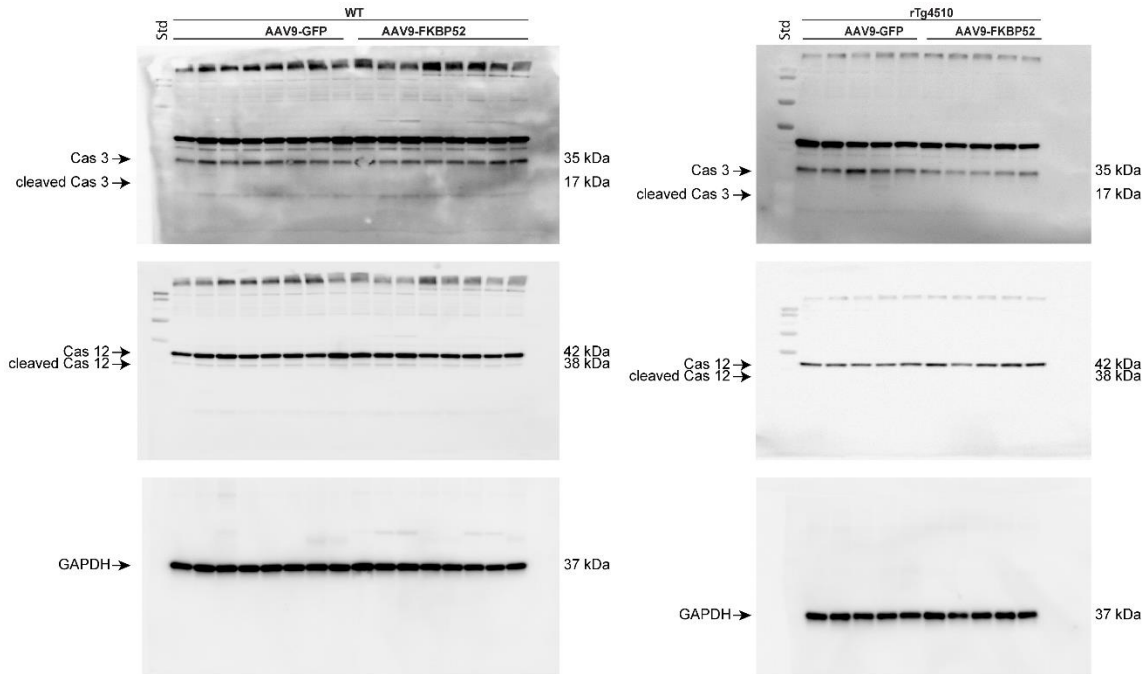

60  
61 **Supplementary Figure 4. Western blot membranes for caspase 3 and caspase 12.**  
62 Membranes were run in parallel and derived from the same experiments. Quantification of protein  
63 was performed using Image Lab (Bio-Rad) software. Total protein was normalized to GAPDH. WT-  
64 GFP (n = 8), WT-FKBP52 (n = 8), rTg4510-GFP (n = 5), rTg4510-FKBP52 (n = 5). AAV9, adeno-  
65 associated virus serotype 9; GFP, green fluorescent protein; GAPDH, Glyceraldehyde 3-phosphate  
66 dehydrogenase; WT, wild-type; Cas, caspase; kDa, kilodalton; Std, Protein Standards.

67
